# Supplementary material for: Unraveling the deep learning gearbox in optical coherence tomography image segmentation towards explainable artificial intelligence
Source: PubMed Central journal article supplement (PMC7864998; doi:10.1038/s42003-021-01697-y), 2021-02-05
Supplement: 42003_2021_1697_MOESM2_ESM.pdf [file 42003_2021_1697_MOESM2_ESM.pdf]

## **Description of Additional Supplementary Files**

**Files:** Supplementary Data 1-5

**Description:** All source data underlying the graphs and charts presented in the main figures.
